# Supplementary material for: Herpud1 deficiency alleviates homocysteine-induced aortic valve calcification
Source: Research Square preprint supplement (doi:10.21203/rs.3.rs-1887767/v1), 2022-08-01
Supplement: Supplementary file 1 [file a2db5d46ce49c85e6cf43847.docx]

Table S1: Sequences of primers used in real-time polymerase chain reaction (Real-time PCR)

| **Gene** | **Primer sequences (5′-3′)** | |
| --- | --- | --- |
| Runx2 | Forward | GCCTTCAAGGTTGTAGCCCT |
| Reverse | TGAAACTCTTGCCTCGTCCG |
| ALP | Forward | CATGTTCCTGGGAGATGGTATG |
| Reverse | GTGTTGTACGTCTTGGAGAGAG |
| Col1 | Forward | CATCGAGTACCGATCACAGAAG |
| Reverse | GCCCTATGTCCACACCAAAT |
| Osteocalcin | Forward | TAAGGTGGTGAATAGACTCCG |
| Reverse | CGGAGTCTATTCACCACCTTA |
| GAPDH | Forward | GCACCGTCAAGGCTGAGAAC |
| Reverse | TGGTGAAGACGCCAGTGGA |
